# Supplementary material for: Notch signaling: simplicity in design, versatility in function
Source: Oxford University Press journal article supplement (doi:10.1242/dev.063610), 2011-08-09
Supplement: dev063610tables1.pdf [file dev063610tables1.pdf]

**Table S1. Notch1 ICD target genes upregulated in ES cells**

| RefSeq ID    | Gene symbol    | Gene name                                                      |
|--------------|----------------|----------------------------------------------------------------|
| NM_007602    | <i>Capn5</i>   | calpain 5                                                      |
| NM_025771    | <i>Cntnap2</i> | contactin associated protein-like 2                            |
| NM_008176    | <i>Cxcl1</i>   | chemokine (C-X-C motif) ligand 1                               |
| NM_001048228 | <i>Dbnnd2</i>  | dysbindin (dystrobrevin binding protein 1) domain containing 2 |
| NM_028618    | <i>Dmkn</i>    | dermokine                                                      |
| NM_010107    | <i>Efna1</i>   | ephrin A1                                                      |
| NM_001043336 | <i>Eml1</i>    | echinoderm microtubule associated protein like 1               |
| NM_175307    | <i>Fam46b</i>  | family with sequence similarity 46, member B                   |
| NM_010218    | <i>Fjx1</i>    | four jointed box 1                                             |
| NM_008655    | <i>Gadd45B</i> | growth arrest and DNA-damage-inducible 45 beta                 |
| NM_010419    | <i>Hes5</i>    | hairy and enhancer of split 5                                  |
| NM_010423    | <i>Hey1</i>    | hairy/enhancer-of-split related with YRPW motif 1              |
| NM_010495    | <i>Id1</i>     | inhibitor of DNA binding 1                                     |
| NM_031166    | <i>Id4</i>     | inhibitor of DNA binding 4                                     |
| NM_133775    | <i>Il33</i>    | interleukin 33                                                 |
| NM_025980    | <i>Nrarp</i>   | Notch-regulated ankyrin repeat protein                         |
| NM_022415    | <i>Ptges</i>   | prostaglandin E synthase                                       |
| NM_181988    | <i>Rerg</i>    | ras-like, estrogen-regulated, growth-inhibitor                 |
| NM_145530    | <i>RhoV</i>    | ras homolog gene family, member V                              |
| NM_028943    | <i>Sgms2</i>   | sphingomyelin synthase 2                                       |
| NM_153533    | <i>Tenc1</i>   | tensin like C1 domain-containing phosphatase                   |
